# Supplementary material for: Comparative transcriptome analysis reveals evolutionary divergence and shared network of cold and salt stress response in diploid D-genome cotton
Source: BMC Plant Biol. 2020 Nov 12;20:518. doi: 10.1186/s12870-020-02726-4 (PMC7664088; doi:10.1186/s12870-020-02726-4)
Supplement: Supplementary file 4 — Additional files 4: Table S4. PSGs identified nine genomes. [file 12870_2020_2726_MOESM4_ESM.xlsx]

## Sheet: Sheet1
Table S4 PSGs identified of nine genome.
Ga	dN/dS	Ghir_A	dN/dS	Gbar_A	dN/dS	Ghir_D	dN/dS	Gbar_D	dN/dS	GD1	dN/dS	GD3	dN/dS	GD5	dN/dS	GD8	dN/dS
Gorai.005G213100	1.0013	Gorai.009G249000	1.0123	Gorai.004G024500	1.2582	Gorai.006G245500	1.2523	Gorai.002G162800	1.9526	Gorai.007G034000	1.0233	Gorai.004G283400	1.142	Gorai.008G298300	1.2645	Gorai.005G174200	2.2214
Gorai.004G164900	1.0029	Gorai.008G298300	1.0117	Gorai.011G027200	1.443	Gorai.001G231000	1.225	Gorai.013G148700	1.1266	Gorai.003G126700	1.2922	Gorai.007G247300	1.2154	Gorai.011G242100	1.3288	Gorai.005G264100	1.0376
Gorai.003G001000	1.0059	Gorai.010G031200	2.5874	Gorai.012G017400	1.1482	Gorai.010G232600	3.3176	Gorai.002G145600	1.2718	Gorai.010G031200	2.4335	Gorai.003G126700	1.2301	Gorai.007G148900	1.293	Gorai.011G038400	1.3587
Gorai.005G238600	1.0085	Gorai.001G083400	2.017	Gorai.001G059100	1.358	Gorai.011G205600	1.4455	Gorai.004G268100	1.3075	Gorai.006G003200	1.1688	Gorai.013G046700	1.1076	Gorai.007G034000	1.2459	Gorai.008G259800	1.1622
Gorai.006G007100	1.0087	Gorai.012G183700	1.2587	Gorai.005G173600	1.0381	Gorai.009G009100	1.0757	Gorai.009G379100	1.0153	Gorai.006G176300	1.8787	Gorai.006G065200	1.1842	Gorai.001G231000	1.1527	Gorai.010G232600	1.4875
Gorai.005G182900	1.009	Gorai.008G072400	2.8559	Gorai.006G112700	2.4987	Gorai.011G206500	2.3462	Gorai.007G308800	1.8281	Gorai.013G029000	1.1406	Gorai.008G190200	1.2235	Gorai.004G107200	1.0166	Gorai.007G362900	1.04
Gorai.003G175900	1.0096	Gorai.003G145800	1.1648	Gorai.008G192600	1.253	Gorai.010G216300	2.1219	Gorai.009G008900	1.3034	Gorai.006G077500	1.0848	Gorai.010G155000	1.2126	Gorai.011G136200	1.2089	Gorai.010G253600	1.8679
Gorai.010G254700	1.0201	Gorai.011G269900	2.0317	Gorai.012G045100	2.7965	Gorai.007G180100	1.1515	Gorai.003G151500	1.1555	Gorai.013G263800	1.0477	Gorai.006G186900	1.0565	Gorai.010G225000	1.2605	Gorai.005G234500	2.0643
Gorai.013G116200	1.0211	Gorai.004G211700	1.1903	Gorai.010G007800	2.6721	Gorai.008G072400	1.1402	Gorai.003G122000	1.191	Gorai.001G132900	1.375	Gorai.013G008100	1.1282	Gorai.005G262800	1.2379	Gorai.001G206500	1.0355
Gorai.013G196000	1.0237	Gorai.009G324500	1.3167	Gorai.006G161500	2.4159	Gorai.003G145800	1.1903	Gorai.010G231300	1.167	Gorai.009G009100	1.0793	Gorai.002G066100	1.4421	Gorai.005G003800	1.0553	Gorai.009G374700	1.012
Gorai.011G257200	1.0241	Gorai.005G173600	1.0407	Gorai.002G192700	1.1637	Gorai.011G269900	3.3601	Gorai.006G079300	1.4988	Gorai.002G100000	2.395	Gorai.012G040400	1.0871	Gorai.004G221400	1.7076	Gorai.012G009000	1.5122
Gorai.010G161700	1.0245	Gorai.007G308800	1.0332	Gorai.009G199000	1.6648	Gorai.008G233100	1.5066	Gorai.006G088000	1.6206	Gorai.010G138700	1.0104	Gorai.011G024000	1.7201	Gorai.011G024000	1.0964	Gorai.002G241600	2.8751
Gorai.013G170300	1.0266	Gorai.012G078700	1.0983	Gorai.012G146100	1.3803	Gorai.006G119200	1.5099	Gorai.008G189800	1.2733	Gorai.001G001100	1.5151	Gorai.006G176300	1.2704	Gorai.008G296700	1.7948	Gorai.007G180100	2.0144
Gorai.006G141700	1.0266	Gorai.009G423800	2.5011	Gorai.001G080300	1.5374	Gorai.011G111000	1.2938	Gorai.002G192700	1.8465	Gorai.013G142700	1.1508	Gorai.004G170000	1.5309	Gorai.012G116900	1.2551	Gorai.009G212300	1.1877
Gorai.010G110000	1.0274	Gorai.011G062600	2.0644	Gorai.003G123800	1.1503	Gorai.007G360100	1.0828	Gorai.012G098300	1.0586	Gorai.007G174700	1.2742	Gorai.011G184800	2.5883	Gorai.007G017300	1.2286	Gorai.011G177400	1.1979
Gorai.010G229700	1.0297	Gorai.009G440400	1.2348	Gorai.009G053000	1.2767	Gorai.007G162700	1.0101	Gorai.005G226700	2.5649	Gorai.007G143100	1.8666	Gorai.007G009000	1.3445	Gorai.001G204800	1.1627	Gorai.011G269900	1.0328
Gorai.006G229700	1.0373	Gorai.008G154700	1.0818	Gorai.007G220700	1.0611	Gorai.011G279300	1.7373	Gorai.004G144800	1.4205	Gorai.007G273200	1.3472	Gorai.006G188000	2.3899	Gorai.010G027900	1.3621	Gorai.004G211700	1.2616
Gorai.009G134500	1.042	Gorai.002G232900	1.869	Gorai.013G266600	1.0938	Gorai.007G175000	1.0144	Gorai.004G131300	1.3989	Gorai.006G254000	1.6863	Gorai.001G260400	1.1077	Gorai.001G083400	2.3962	Gorai.001G095000	1.3777
Gorai.003G170000	1.0426	Gorai.010G116900	1.3759	Gorai.008G198200	1.1633	Gorai.008G120700	1.0668	Gorai.006G230000	1.0562	Gorai.009G294300	1.7875	Gorai.010G186200	1.1267	Gorai.001G134400	1.0127	Gorai.007G174700	1.2793
Gorai.006G188900	1.0449	Gorai.003G153800	2.0749	Gorai.001G144100	1.2186	Gorai.011G246100	1.1455	Gorai.001G011300	1.1734	Gorai.007G173200	2.1427	Gorai.002G226600	1.9276	Gorai.002G226600	1.1886	Gorai.009G134700	1.5745
Gorai.009G201300	1.0476	Gorai.003G096100	1.4355	Gorai.008G234500	2.1005	Gorai.008G139800	1.1258	Gorai.009G225800	1.1384	Gorai.011G279300	1.7499	Gorai.013G158100	1.9621	Gorai.008G072400	1.1297	Gorai.N007400	1.2997
Gorai.007G177400	1.0477	Gorai.006G241600	1.7574	Gorai.011G168900	1.0013	Gorai.011G253900	1.3197	Gorai.006G153100	1.046	Gorai.005G173600	1.9971	Gorai.008G068700	1.2737	Gorai.013G142700	1.733	Gorai.013G188400	1.4071
Gorai.006G180700	1.0479	Gorai.006G053500	1.153	Gorai.004G116000	1.0306	Gorai.013G108200	1.0138	Gorai.005G179600	1.0305	Gorai.008G151600	1.1643	Gorai.003G145800	3.9144	Gorai.003G145800	3.9136	Gorai.010G195500	1.064
Gorai.006G236000	1.0483	Gorai.002G079000	2.8177	Gorai.013G238000	1.0412	Gorai.005G233700	1.1277	Gorai.011G188700	1.078	Gorai.006G179200	1.0672	Gorai.012G020100	1.0271	Gorai.002G248500	2.0631	Gorai.009G266300	1.1389
Gorai.010G207100	1.0513	Gorai.008G144800	3.0149	Gorai.011G139000	1.0592	Gorai.005G079300	1.1695	Gorai.013G252800	1.2279	Gorai.006G122400	1.4565	Gorai.005G100500	1.1925	Gorai.013G133200	1.0573	Gorai.008G188400	1.1433
Gorai.006G081300	1.0524	Gorai.002G229400	1.7556	Gorai.006G145800	1.1104	Gorai.007G210600	1.63	Gorai.012G134800	1.5032	Gorai.007G308800	1.1034	Gorai.009G187700	1.2135	Gorai.011G225900	2.2876	Gorai.010G093100	2.4182
Gorai.006G245300	1.056	Gorai.008G210900	1.5852	Gorai.005G151100	1.1885	Gorai.012G183300	1.4186	Gorai.005G171400	1.0548	Gorai.005G004000	3.3934	Gorai.011G213500	1.243	Gorai.004G183300	2.1476	Gorai.005G129100	5.4985
Gorai.007G267600	1.0562	Gorai.005G115300	1.6088	Gorai.005G208900	1.218	Gorai.004G036800	1.0216	Gorai.012G045200	1.6763	Gorai.008G188400	1.4188	Gorai.002G057400	1.4662	Gorai.003G047100	1.289	Gorai.006G029600	2.0894
Gorai.001G265200	1.0583	Gorai.008G225000	2.5391	Gorai.005G213200	1.2285	Gorai.004G259200	1.2462	Gorai.006G145800	1.1581	Gorai.004G171900	1.8881	Gorai.012G187500	1.089	Gorai.010G203700	1.5528	Gorai.007G307100	1.3658
Gorai.009G157800	1.0628	Gorai.009G053000	1.1298	Gorai.008G187700	1.2323	Gorai.009G313600	1.2623	Gorai.005G170200	1.0435	Gorai.007G175600	2.3236	Gorai.007G044000	1.3641	Gorai.007G233100	1.4045	Gorai.011G046600	1.1067
Gorai.008G093000	1.0675	Gorai.010G047500	1.0058	Gorai.013G018200	1.2554	Gorai.006G058600	3.6099	Gorai.013G130400	1.0847	Gorai.012G183500	2.2414	Gorai.007G233100	1.0201	Gorai.002G197700	2.5795	Gorai.004G188700	1.2165
Gorai.013G144900	1.0685	Gorai.013G266400	1.0113	Gorai.004G126100	1.3088	Gorai.006G177500	1.3915	Gorai.001G172400	1.7946	Gorai.010G093100	2.1341	Gorai.008G046800	1.1058	Gorai.004G227700	4.5328	Gorai.006G018000	1.2326
Gorai.006G058600	1.0694	Gorai.001G077300	1.0374	Gorai.009G091300	1.3391	Gorai.012G090700	1.3486	Gorai.011G206000	1.2009	Gorai.011G065200	1.2704	Gorai.002G197700	1.2421	Gorai.004G258400	1.3746	Gorai.011G166100	2.1459
Gorai.009G008500	1.0716	Gorai.003G087400	1.0633	Gorai.012G128400	1.5239	Gorai.003G028400	1.0794	Gorai.004G023000	1.252	Gorai.007G275200	6.4613	Gorai.008G249400	1.6	Gorai.002G146100	1.1135	Gorai.004G211600	1.6669
Gorai.004G128500	1.0724	Gorai.004G018900	1.0696	Gorai.003G002900	1.5433	Gorai.004G191800	2.1272	Gorai.010G216200	1.3653	Gorai.004G220100	1.272	Gorai.002G146100	1.9151	Gorai.N007400	2.3058	Gorai.005G129600	1.1978
Gorai.010G215700	1.0746	Gorai.008G013800	1.0828	Gorai.007G067900	1.5892	Gorai.009G139700	2.2365	Gorai.011G206700	2.1876	Gorai.010G144100	1.0342	Gorai.012G171600	1.0186	Gorai.007G143100	2.017	Gorai.005G238600	5.1909
Gorai.007G108400	1.0766	Gorai.012G039300	1.0874	Gorai.006G140000	1.6274	Gorai.001G042000	2.1475	Gorai.004G283500	1.3995	Gorai.008G216900	5.4041	Gorai.007G162700	1.0096	Gorai.012G128000	1.6302	Gorai.009G008500	1.7557
Gorai.012G020500	1.0816	Gorai.010G155500	1.0972	Gorai.007G142400	1.6603	Gorai.005G083600	1.7867	Gorai.007G009100	1.0169	Gorai.008G287000	1.0249	Gorai.011G279300	1.0554	Gorai.007G162700	1.1748	Gorai.007G360700	1.4654
Gorai.009G298200	1.0835	Gorai.013G252800	1.1003	Gorai.003G054300	1.6698	Gorai.001G117200	2.3762	Gorai.007G214400	1.026	Gorai.009G199000	1.2398	Gorai.008G050400	1.3756	Gorai.005G173600	1.0644	Gorai.004G264200	1.348
Gorai.011G132500	1.0841	Gorai.007G008000	1.1067	Gorai.006G215800	1.8035	Gorai.004G192900	1.0976	Gorai.009G248200	1.0468	Gorai.009G123100	1.1818	Gorai.009G078900	1.1532	Gorai.010G195500	1.4163	Gorai.003G125700	1.0827
Gorai.005G006000	1.0899	Gorai.009G246200	1.1099	Gorai.004G260600	1.8519	Gorai.001G139200	1.0686	Gorai.001G121000	1.074	Gorai.010G208000	2.519	Gorai.008G136000	1.034	Gorai.009G115100	1.2111	Gorai.004G264500	2.5684
Gorai.011G295600	1.091	Gorai.013G235900	1.1267	Gorai.004G103700	1.9036	Gorai.008G048000	2.0652	Gorai.001G199800	1.0747	Gorai.001G036700	1.375	Gorai.006G257000	2.472	Gorai.007G308800	1.6614	Gorai.008G226700	2.2923
Gorai.007G137700	1.0937	Gorai.013G267800	1.1574	Gorai.013G263700	1.904	Gorai.010G079400	2.0115	Gorai.002G093500	1.096	Gorai.010G116900	1.2873	Gorai.008G296900	1.0907	Gorai.008G120700	1.8563	Gorai.005G013400	2.4292
Gorai.008G266100	1.0983	Gorai.002G053700	1.166	Gorai.011G278500	2.1106	Gorai.009G451700	1.4768	Gorai.007G352500	1.1056	Gorai.007G131200	2.276	Gorai.004G269400	1.2403	Gorai.005G201900	2.1098	Gorai.003G151000	1.2789
Gorai.008G100800	1.1013	Gorai.007G147500	1.1837	Gorai.005G154000	2.1905	Gorai.010G122100	1.1977	Gorai.012G036200	1.1387	Gorai.002G064500	1.1218	Gorai.009G088400	1.4037	Gorai.009G092500	1.124	Gorai.012G056000	1.1292
Gorai.001G240700	1.1023	Gorai.006G134000	1.1992	Gorai.002G130600	2.5011	Gorai.009G246200	1.3239	Gorai.010G064900	1.1754	Gorai.012G116000	1.1853	Gorai.004G226600	1.1052	Gorai.005G004000	2.066	Gorai.008G217900	1.6574
Gorai.001G030000	1.1024	Gorai.011G242500	1.2374	Gorai.013G068400	2.51	Gorai.011G059500	1.0396	Gorai.010G116000	1.1985	Gorai.001G035300	1.614	Gorai.007G308800	1.1881	Gorai.013G038700	2.2157	Gorai.001G024600	1.3834
Gorai.003G152700	1.1083	Gorai.008G283800	1.244	Gorai.006G252000	2.6852	Gorai.011G040900	1.0087	Gorai.007G114000	1.2323	Gorai.010G222300	1.241	Gorai.009G213800	1.3702	Gorai.009G347000	1.1247	Gorai.010G111300	1.0099
Gorai.012G038100	1.1167	Gorai.004G131200	1.2618	Gorai.007G192500	2.9072	Gorai.001G026900	1.251	Gorai.003G028700	1.2586	Gorai.006G241600	1.3004	Gorai.010G170900	1.1311	Gorai.005G133200	1.5435	Gorai.005G130500	2.6972
Gorai.007G198000	1.1203	Gorai.012G134800	1.303	Gorai.006G235400	3.1931	Gorai.012G128400	1.8762	Gorai.009G182800	1.2701	Gorai.006G018000	1.2311	Gorai.013G038700	1.108	Gorai.002G095200	1.1708	Gorai.011G195300	1.5221
Gorai.004G270600	1.1224	Gorai.013G258600	1.3219	Gorai.006G134300	3.707	Gorai.007G072800	1.0027	Gorai.001G205800	1.3531	Gorai.008G247300	1.113	Gorai.007G353200	1.4971	Gorai.010G093100	1.0087	Gorai.007G220700	1.2901
Gorai.005G145900	1.1283	Gorai.006G244800	1.3591			Gorai.009G303800	1.0117	Gorai.013G164200	1.428	Gorai.007G142300	1.2224	Gorai.009G083800	1.1132	Gorai.007G317200	1.3825	Gorai.004G129000	1.1244
Gorai.009G426200	1.1379	Gorai.010G185800	1.3591			Gorai.007G096900	1.0186	Gorai.007G180500	1.4359	Gorai.005G129600	1.6079	Gorai.006G106700	1.1289	Gorai.013G211600	1.5495	Gorai.006G091800	1.6665
Gorai.009G069800	1.1379	Gorai.011G097400	1.3725			Gorai.006G227200	1.023	Gorai.013G050900	1.4449	Gorai.008G144800	1.2381	Gorai.010G171800	1.0083	Gorai.011G126900	1.3074	Gorai.002G146000	1.4157
Gorai.013G148200	1.1474	Gorai.009G114600	1.3982			Gorai.012G143200	1.0335	Gorai.007G372200	1.447	Gorai.005G182900	1.1191	Gorai.013G195600	1.3849	Gorai.002G140700	1.0641	Gorai.009G327100	1.1274
Gorai.009G198600	1.1482	Gorai.005G171400	1.4067			Gorai.005G077800	1.037	Gorai.009G262600	1.5357	Gorai.010G110000	1.6235	Gorai.008G053600	1.0247	Gorai.006G236700	2.2409	Gorai.011G240500	2.8059
Gorai.008G275300	1.1511	Gorai.013G211300	1.4263			Gorai.004G097000	1.0514	Gorai.009G237600	1.5406	Gorai.003G170000	1.4264	Gorai.008G137400	1.2341	Gorai.001G088500	2.3615	Gorai.008G229900	2.9464
Gorai.007G360700	1.1599	Gorai.008G147100	1.4323			Gorai.009G179800	1.0856	Gorai.012G008600	1.5488	Gorai.007G108400	1.3456	Gorai.011G126900	1.2914	Gorai.010G045500	2.0611	Gorai.007G147500	2.4424
Gorai.001G241600	1.1599	Gorai.009G121400	1.5095			Gorai.009G230300	1.1047	Gorai.001G006200	1.6429	Gorai.001G240700	1.2186	Gorai.002G140700	2.817	Gorai.007G293700	1.5818	Gorai.009G121400	1.4659
Gorai.001G011300	1.1636	Gorai.013G167500	1.5859			Gorai.008G169200	1.1247	Gorai.007G127200	1.6498	Gorai.007G353300	1.1934	Gorai.007G293700	3.0515	Gorai.008G216900	5.8966	Gorai.001G154000	1.236
Gorai.002G246900	1.1638	Gorai.001G154000	1.63			Gorai.009G297600	1.1315	Gorai.003G096900	1.7049	Gorai.006G094800	1.2863	Gorai.011G253900	2.1282	Gorai.004G046600	1.5083	Gorai.004G067900	1.0813
Gorai.002G205600	1.1645	Gorai.007G251000	1.6976			Gorai.004G072100	1.1317	Gorai.009G186100	1.7286	Gorai.001G080300	1.6188	Gorai.007G275200	7.0246	Gorai.007G307100	2.2755	Gorai.004G266000	1.2954
Gorai.012G013100	1.1693	Gorai.013G019500	1.7145			Gorai.006G142900	1.1361	Gorai.005G193300	1.739	Gorai.012G008200	3.0262	Gorai.007G133200	1.7451	Gorai.003G099300	1.7707	Gorai.010G013800	1.0533
Gorai.008G038000	1.1754	Gorai.004G178200	1.7323			Gorai.005G265300	1.1408	Gorai.013G168200	1.9729	Gorai.001G243800	1.3721	Gorai.001G208900	1.4514	Gorai.012G098300	1.4089	Gorai.013G037300	1.1298
Gorai.009G346000	1.1873	Gorai.002G129100	1.7392			Gorai.013G053900	1.1486	Gorai.005G057500	2.1395	Gorai.009G241800	3.3643	Gorai.008G216900	2.6082	Gorai.012G014700	1.4188	Gorai.002G142000	1.0979
Gorai.005G088400	1.1916	Gorai.008G272600	1.8173			Gorai.007G101800	1.1848	Gorai.001G109900	2.4156	Gorai.007G076500	1.9272	Gorai.011G088600	1.6513	Gorai.010G247300	1.8949	Gorai.005G222500	1.5463
Gorai.011G075400	1.1938	Gorai.007G109900	1.8218			Gorai.013G215400	1.1907	Gorai.004G193900	2.4604	Gorai.012G146700	4.7625	Gorai.010G208000	2.1569	Gorai.013G034200	1.1101	Gorai.008G262800	1.8003
Gorai.011G188500	1.1956	Gorai.006G049500	1.8602			Gorai.008G064300	1.2048	Gorai.002G104500	2.949	Gorai.013G261200	1.1489	Gorai.009G146900	1.8594	Gorai.006G132800	1.1896	Gorai.001G100200	1.4425
Gorai.008G006200	1.1967	Gorai.004G186100	1.9456			Gorai.008G139100	1.2762	Gorai.007G303000	3.6418	Gorai.013G226300	1.7366	Gorai.013G114300	2.2303	Gorai.013G114300	4.1205	Gorai.002G058700	1.2781
Gorai.005G209000	1.2002	Gorai.005G135100	2.0196			Gorai.009G239900	1.2891	Gorai.011G187900	4.1728	Gorai.005G030200	1.2688	Gorai.008G109500	1.5027	Gorai.011G115900	1.2702	Gorai.009G260000	1.5592
Gorai.009G134300	1.2044	Gorai.012G045200	2.6456			Gorai.009G265700	1.3273			Gorai.004G284300	1.1733	Gorai.011G111800	1.634	Gorai.004G113800	1.5956	Gorai.005G240300	1.7334
Gorai.003G041200	1.2077	Gorai.009G398000	2.7412			Gorai.009G025800	1.3282			Gorai.008G283800	1.3765	Gorai.004G014200	2.6317	Gorai.002G173700	1.0656	Gorai.009G013800	1.2614
Gorai.005G039200	1.2081	Gorai.006G039300	2.8471			Gorai.002G199100	1.3459			Gorai.008G234500	1.249	Gorai.002G250400	2.0471	Gorai.005G226700	2.865	Gorai.005G244600	1.0191
Gorai.012G005700	1.2222	Gorai.006G017900	3.0001			Gorai.011G206700	1.3714			Gorai.012G044400	1.9779	Gorai.008G221500	1.6165	Gorai.005G019900	1.5545	Gorai.002G244800	1.0559
Gorai.005G220300	1.2267	Gorai.012G048300	3.011			Gorai.001G013100	1.3801			Gorai.001G150400	1.1612	Gorai.003G096100	1.0771	Gorai.005G257400	1.0429	Gorai.013G051200	1.0769
Gorai.011G255900	1.229	Gorai.009G000300	4.4525			Gorai.013G007900	1.3869			Gorai.004G266000	1.3621	Gorai.010G014100	1.0637	Gorai.008G070500	1.0377	Gorai.008G090400	1.5056
Gorai.009G241400	1.2319	Gorai.008G234500	5.1217			Gorai.009G126700	1.3892			Gorai.009G006500	1.7051	Gorai.011G239000	1.0775	Gorai.010G164800	1.0197	Gorai.008G210500	1.1641
Gorai.004G264200	1.2376					Gorai.001G017200	1.4133			Gorai.012G128400	2.988	Gorai.008G069600	1.0806	Gorai.004G144800	1.0642	Gorai.009G011500	1.4453
Gorai.008G295200	1.2445					Gorai.003G154000	1.4348			Gorai.004G286700	1.7582	Gorai.008G217500	1.1041	Gorai.012G116000	1.3049	Gorai.012G143100	1.3337
Gorai.008G257000	1.2479					Gorai.005G045400	1.4743			Gorai.002G058700	1.0628	Gorai.009G259300	1.3151	Gorai.007G302200	1.0372	Gorai.001G172400	1.1891
Gorai.009G004300	1.25					Gorai.009G420900	1.4942			Gorai.001G276100	2.9444	Gorai.009G190500	1.5398	Gorai.008G069600	1.4499	Gorai.001G254100	1.333
Gorai.007G049000	1.2544					Gorai.010G189900	1.4949			Gorai.006G236200	1.0145	Gorai.009G028000	2.0303	Gorai.008G217100	1.1194	Gorai.004G072100	1.2301
Gorai.003G125700	1.2611					Gorai.009G030300	1.5024			Gorai.006G145300	1.4372	Gorai.006G241600	1.7911	Gorai.012G183300	2.1335	Gorai.009G243300	1.1213
Gorai.004G264500	1.2627					Gorai.012G166500	1.5362			Gorai.013G007100	1.8297	Gorai.001G145000	1.1093	Gorai.009G028000	1.8142	Gorai.013G025600	2.0905
Gorai.004G009500	1.2654					Gorai.004G283500	1.6199			Gorai.009G179800	1.2578	Gorai.001G213700	1.2143	Gorai.007G172200	1.0107	Gorai.007G073000	2.8031
Gorai.003G117600	1.2716					Gorai.006G001700	1.6235			Gorai.004G072100	1.4177	Gorai.009G313600	1.4928	Gorai.008G247300	1.809	Gorai.008G289800	1.2882
Gorai.007G189400	1.2751					Gorai.013G252000	1.646			Gorai.013G053900	1.1427	Gorai.005G213100	1.334	Gorai.011G166100	1.0719	Gorai.011G268300	1.173
Gorai.003G008700	1.2849					Gorai.007G294800	1.6492			Gorai.008G218100	1.4463	Gorai.004G164900	1.0166	Gorai.009G125600	1.3926	Gorai.009G203100	2.6665
Gorai.011G056800	1.2851					Gorai.006G255700	1.6544			Gorai.010G140700	1.329	Gorai.005G238600	1.5221	Gorai.007G142300	1.3356	Gorai.012G109000	2.0856
Gorai.007G175700	1.2887					Gorai.010G018000	1.6764			Gorai.002G214100	1.1223	Gorai.003G175900	1.0819	Gorai.009G012400	2.2066	Gorai.010G059400	1.0268
Gorai.001G050900	1.2917					Gorai.007G186900	1.6811			Gorai.011G012900	1.5445	Gorai.006G058600	2.0059	Gorai.006G048600	1.2798	Gorai.005G149900	1.7761
Gorai.002G249900	1.307					Gorai.004G266400	1.7461			Gorai.002G093500	1.1597	Gorai.007G108400	2.121	Gorai.002G079000	1.0249	Gorai.013G050900	1.0872
Gorai.003G179100	1.32					Gorai.002G104400	1.7465			Gorai.007G152200	1.009	Gorai.012G020500	1.1402	Gorai.013G014700	1.1364	Gorai.013G249800	2.2757
Gorai.005G244400	1.3202					Gorai.005G028500	1.8156			Gorai.006G202700	1.0148	Gorai.007G198000	1.1474	Gorai.011G293700	1.4102	Gorai.013G226200	2.5024
Gorai.003G070500	1.3406					Gorai.012G184800	1.8304			Gorai.006G034100	1.0173	Gorai.009G241400	1.6009	Gorai.005G268700	1.0057	Gorai.013G141900	1.0077
Gorai.009G347800	1.3487					Gorai.009G312100	1.9455			Gorai.004G013400	1.0281	Gorai.004G264200	1.087	Gorai.005G182900	2.6028	Gorai.012G073500	1.1679
Gorai.013G141600	1.3505					Gorai.001G144900	1.9781			Gorai.007G014800	1.0704	Gorai.003G125700	1.5641	Gorai.010G110000	1.3655	Gorai.003G001300	1.1476
Gorai.006G177500	1.3567					Gorai.002G252100	2.2933			Gorai.003G135500	1.0901	Gorai.004G264500	4.2876	Gorai.003G170000	1.0081	Gorai.004G047800	1.4847
Gorai.006G102800	1.3681					Gorai.013G203200	2.2993			Gorai.003G149300	1.0987	Gorai.003G117600	1.0857	Gorai.002G205600	1.0222	Gorai.009G296300	1.4876
Gorai.002G101600	1.3804					Gorai.012G040900	2.5215			Gorai.008G055200	1.1067	Gorai.007G189400	1.4758	Gorai.004G264200	2.1826	Gorai.013G050100	2.549
Gorai.006G135000	1.3821					Gorai.008G160900	2.7211			Gorai.001G046600	1.1144	Gorai.002G101600	1.3796	Gorai.007G189400	1.2708	Gorai.001G043000	2.2517
Gorai.007G105300	1.3829					Gorai.008G032700	2.7522			Gorai.007G288200	1.1223	Gorai.008G210900	1.6031	Gorai.001G050900	1.124	Gorai.008G048200	1.1471
Gorai.001G199400	1.3865					Gorai.003G019400	3.6782			Gorai.009G123800	1.1331	Gorai.003G062300	1.222	Gorai.003G179100	1.8466	Gorai.009G345200	1.3889
Gorai.001G218200	1.3928									Gorai.009G351800	1.1333	Gorai.005G184000	1.6232	Gorai.005G244400	1.6671	Gorai.005G135700	1.1004
Gorai.002G229400	1.3951									Gorai.006G177900	1.1357	Gorai.002G136400	1.085	Gorai.001G199400	1.0807	Gorai.007G182300	1.1291
Gorai.012G079600	1.3958									Gorai.009G322200	1.1486	Gorai.008G226700	1.5202	Gorai.013G049500	1.1052	Gorai.009G193000	1.656
Gorai.007G265000	1.4077									Gorai.001G082300	1.1846	Gorai.008G016300	1.0406	Gorai.008G287400	1.3104	Gorai.009G441900	2.7996
Gorai.012G149600	1.4102									Gorai.006G179700	1.188	Gorai.009G037900	1.0515	Gorai.006G094800	1.1328	Gorai.013G180200	1.3389
Gorai.012G026500	1.4126									Gorai.006G234300	1.1987	Gorai.006G136500	2.2161	Gorai.009G139700	2.3028	Gorai.010G217900	1.9971
Gorai.004G198300	1.4174									Gorai.003G171500	1.2018	Gorai.006G094800	2.2665	Gorai.002G067800	1.1672	Gorai.005G057400	1.0196
Gorai.009G262500	1.4283									Gorai.006G169400	1.2185	Gorai.001G080300	4.6383	Gorai.007G094900	1.3105	Gorai.013G178700	1.2651
Gorai.006G178000	1.4392									Gorai.006G269200	1.2327	Gorai.009G225800	1.6885	Gorai.009G412600	1.0772	Gorai.012G158400	1.0232
Gorai.006G025800	1.4429									Gorai.011G180100	1.2453	Gorai.007G094900	2.2907	Gorai.007G083800	1.2514	Gorai.004G178400	1.0664
Gorai.008G238300	1.4471									Gorai.002G181000	1.2498	Gorai.009G243900	1.6073	Gorai.009G241800	3.7694	Gorai.006G069200	1.2192
Gorai.010G112900	1.4489									Gorai.013G194300	1.2558	Gorai.005G069100	1.002	Gorai.004G204300	1.0176	Gorai.009G304700	1.8404
Gorai.007G052400	1.4499									Gorai.006G143100	1.268	Gorai.001G175300	1.674	Gorai.011G088700	1.0249	Gorai.008G217700	1.5888
Gorai.008G210900	1.4552									Gorai.003G162000	1.2812	Gorai.001G007500	1.0118	Gorai.012G066000	5.2772	Gorai.010G165300	1.1047
Gorai.003G062300	1.4575									Gorai.010G237400	1.2928	Gorai.006G115500	1.7066	Gorai.009G239600	1.4564	Gorai.001G046300	1.078
Gorai.013G049500	1.4701									Gorai.012G136300	1.3525	Gorai.010G108900	1.5042	Gorai.008G055000	2.9478	Gorai.008G225500	1.72
Gorai.005G184000	1.4719									Gorai.001G034500	1.3918	Gorai.006G006700	1.075	Gorai.009G072300	3.4229	Gorai.007G047300	2.079
Gorai.005G070400	1.4832									Gorai.002G265000	1.4019	Gorai.001G175100	1.5704	Gorai.007G018600	1.3066	Gorai.008G257500	1.1311
Gorai.007G116800	1.5122									Gorai.009G422000	1.4057	Gorai.013G262800	2.9432	Gorai.001G144100	1.5417	Gorai.006G042400	2.1508
Gorai.009G202900	1.5318									Gorai.009G144000	1.4071	Gorai.008G006000	1.3035	Gorai.001G069100	1.0017	Gorai.012G044200	2.7014
Gorai.012G090700	1.5496									Gorai.013G255100	1.4203	Gorai.011G058300	1.2924	Gorai.010G155500	1.7441	Gorai.011G068800	4.0914
Gorai.006G033800	1.5519									Gorai.003G093500	1.4261	Gorai.004G281500	1.4604	Gorai.005G171400	1.3603	Gorai.002G265500	2.1835
Gorai.002G136400	1.5596									Gorai.007G259500	1.4295	Gorai.001G139200	1.0529	Gorai.007G109900	1.383	Gorai.005G071000	1.9285
Gorai.001G192500	1.5645									Gorai.006G236600	1.4678	Gorai.010G072200	1.0752	Gorai.008G234500	1.3135	Gorai.008G255400	2.8556
Gorai.008G226700	1.5672									Gorai.004G183900	1.4922	Gorai.013G062000	1.5321	Gorai.007G090700	1.1786	Gorai.011G085100	1.1318
Gorai.001G237900	1.5757									Gorai.013G250400	1.4987	Gorai.012G146700	5.6604	Gorai.001G071300	1.4771	Gorai.010G139000	1.7146
Gorai.003G028400	1.5855									Gorai.011G134500	1.5098	Gorai.009G410700	1.4121	Gorai.013G002500	1.0547	Gorai.010G128800	1.2106
Gorai.005G115300	1.5934									Gorai.001G020100	1.5344	Gorai.007G212500	1.1086	Gorai.010G230600	1.59	Gorai.009G398700	2.9423
Gorai.008G016300	1.5974									Gorai.007G256500	1.5837	Gorai.013G111900	1.2435	Gorai.009G006500	1.3858	Gorai.006G121200	1.4056
Gorai.007G039000	1.6133									Gorai.010G096400	1.599	Gorai.006G147500	1.6649	Gorai.001G114900	1.3964	Gorai.002G237800	1.3042
Gorai.009G037900	1.6283									Gorai.009G228600	1.6595	Gorai.011G242500	1.2421	Gorai.010G138500	1.096	Gorai.008G042500	1.1849
Gorai.007G080300	1.672									Gorai.009G072900	1.6874	Gorai.013G258600	1.0613	Gorai.007G251800	1.544	Gorai.012G017600	1.3108
Gorai.011G191500	1.6828									Gorai.010G044000	1.689	Gorai.012G048300	1.2697	Gorai.013G037300	1.565	Gorai.012G136900	1.3901
Gorai.005G013400	1.6849									Gorai.004G200500	1.6951	Gorai.008G234500	2.8553	Gorai.004G113600	1.5859	Gorai.010G225400	5.2286
Gorai.008G287400	1.6993									Gorai.003G181600	1.7292	Gorai.009G414900	1.11	Gorai.009G265400	3.8894	Gorai.010G024400	1.0486
Gorai.006G136500	1.6999									Gorai.008G099400	1.7798	Gorai.001G150400	1.4592	Gorai.006G145800	1.2555	Gorai.004G089400	1.0524
Gorai.007G353300	1.7061									Gorai.005G146600	1.7929	Gorai.004G266000	1.1193	Gorai.002G266400	1.3414	Gorai.013G254300	1.0564
Gorai.012G156100	1.7089									Gorai.004G173800	1.8103	Gorai.009G366600	1.587	Gorai.002G195800	1.7107	Gorai.013G087900	1.0711
Gorai.007G254200	1.709									Gorai.008G295700	1.8414	Gorai.005G168700	3.9354	Gorai.006G113300	1.1142	Gorai.013G013200	1.0724
Gorai.003G151000	1.724									Gorai.006G002000	1.8699	Gorai.007G065400	1.1825	Gorai.008G001300	2.522	Gorai.007G362800	1.0856
Gorai.011G203600	1.8223									Gorai.006G184500	1.9252	Gorai.007G196000	2.678	Gorai.012G166600	1.116	Gorai.008G177200	1.1378
Gorai.006G094800	1.8336									Gorai.007G018700	1.9384	Gorai.007G309000	1.2533	Gorai.003G181400	4.863	Gorai.007G216200	1.1468
Gorai.009G196900	1.8351									Gorai.013G073100	1.9439	Gorai.007G300000	1.2275	Gorai.009G305300	1.5876	Gorai.007G273600	1.147
Gorai.004G191800	1.8502									Gorai.002G225700	2.0054	Gorai.005G254500	1.6773	Gorai.002G084300	1.1958	Gorai.005G193900	1.1842
Gorai.009G139700	1.8511									Gorai.011G094900	2.1342	Gorai.005G084500	1.5731	Gorai.007G203300	1.3468	Gorai.007G221700	1.2497
Gorai.005G078200	1.8852									Gorai.009G097300	2.2259	Gorai.009G158100	1.6041	Gorai.011G026600	2.0539	Gorai.011G072800	1.2592
Gorai.007G256800	1.8884									Gorai.004G213200	2.301	Gorai.010G073800	1.0421	Gorai.012G115100	1.3029	Gorai.012G013900	1.3032
Gorai.001G080300	1.8895									Gorai.007G092400	2.3728	Gorai.011G024500	1.4584	Gorai.012G042500	1.1389	Gorai.013G153000	1.3668
Gorai.005G187300	1.8899									Gorai.008G067500	2.4287	Gorai.006G252600	1.9243	Gorai.004G182300	1.1743	Gorai.013G171600	1.4475
Gorai.007G126000	1.9143									Gorai.004G134900	2.4952	Gorai.001G026900	1.2471	Gorai.010G180500	2.4501	Gorai.009G124300	1.5514
Gorai.009G225800	1.9282									Gorai.010G237200	2.5262	Gorai.001G093200	1.3979	Gorai.002G063500	1.0051	Gorai.004G108800	1.6384
Gorai.004G145200	1.9661									Gorai.001G008800	2.5376	Gorai.005G213200	1.4832	Gorai.009G179800	1.2497	Gorai.013G029100	1.8342
Gorai.006G153100	1.9852									Gorai.008G239200	2.5405	Gorai.009G005200	1.2095	Gorai.003G154000	3.0843	Gorai.005G066700	1.9007
Gorai.009G170400	1.9924									Gorai.013G050100	2.5862	Gorai.010G183100	1.1317	Gorai.007G294800	1.6492	Gorai.010G044500	1.9192
Gorai.001G042000	2.0082									Gorai.013G093200	2.6813	Gorai.002G058700	2.2238	Gorai.013G203200	1.1008	Gorai.001G005500	2.1351
Gorai.002G067800	2.0447									Gorai.001G134800	3.2265	Gorai.010G198300	1.1688	Gorai.010G125500	1.0873	Gorai.007G126200	2.3057
Gorai.011G160800	2.0518									Gorai.012G110700	3.2371	Gorai.005G141300	1.1414	Gorai.004G171700	2.5345	Gorai.004G193100	3.2287
Gorai.002G069600	2.1281									Gorai.002G169200	3.4569	Gorai.012G166600	1.2592	Gorai.007G073000	1.0577	Gorai.007G254400	6.9535
Gorai.001G080000	2.2336									Gorai.009G410400	5.6844	Gorai.010G013400	1.0963	Gorai.009G304000	1.609
Gorai.007G094900	2.2394									Gorai.008G236500	32.4258	Gorai.002G084300	1.1721	Gorai.011G143000	1.0246
Gorai.010G017800	2.2821											Gorai.013G137200	1.0894	Gorai.003G008200	2.4949
Gorai.003G123800	2.305											Gorai.005G173900	1.5854	Gorai.008G160300	1.1582
Gorai.009G237500	2.3165											Gorai.013G118700	1.1709	Gorai.009G203100	1.7299
Gorai.010G052600	2.3274											Gorai.009G221400	1.8388	Gorai.011G012900	2.5943
Gorai.004G011700	2.3536											Gorai.010G002700	1.3789	Gorai.010G044900	1.0024
Gorai.013G119000	2.4943											Gorai.013G270100	1.0268	Gorai.008G187500	1.944
Gorai.008G225000	2.5369											Gorai.011G026600	1.8313	Gorai.007G114000	1.3127
Gorai.004G018200	2.5487											Gorai.006G082300	1.01	Gorai.003G099400	1.5108
Gorai.005G179600	2.5601											Gorai.013G134800	1.3481	Gorai.N026600	1.0727
Gorai.009G053000	2.5619											Gorai.010G088400	1.2239	Gorai.006G126500	1.577
Gorai.004G177200	2.7589											Gorai.013G092200	1.375	Gorai.007G293600	1.2224
Gorai.008G028700	2.7881											Gorai.009G297600	2.6189	Gorai.009G018100	5.3618
Gorai.005G189700	2.9999											Gorai.006G142900	1.3707	Gorai.006G251400	1.6563
Gorai.005G131600	3.3587											Gorai.009G265700	3.221	Gorai.005G175900	2.0397
Gorai.012G056000	3.3766											Gorai.004G283500	1.389	Gorai.005G166900	1.03
Gorai.009G094300	3.7004											Gorai.013G252000	1.3147	Gorai.007G268700	1.5957
Gorai.009G349800	5.0414											Gorai.012G184800	2.0653	Gorai.003G042500	1.0139
												Gorai.008G124200	1.0081	Gorai.013G013300	1.7067
												Gorai.001G006100	1.5264	Gorai.006G246200	1.8297
												Gorai.007G073000	1.6954	Gorai.007G064700	1.2881
												Gorai.010G140700	1.3301	Gorai.012G073500	1.1699
												Gorai.006G243700	1.0283	Gorai.009G130300	1.4895
												Gorai.006G116700	1.0439	Gorai.005G147000	1.2841
												Gorai.N003600	1.1083	Gorai.002G106100	1.2235
												Gorai.007G341700	1.08	Gorai.005G225500	1.3296
												Gorai.011G268300	1.2468	Gorai.009G069700	1.4275
												Gorai.011G039100	1.6016	Gorai.007G007900	1.5482
												Gorai.010G208900	3.3887	Gorai.012G114000	1.1072
												Gorai.010G059400	1.0222	Gorai.008G294400	1.4547
												Gorai.011G069100	1.5229	Gorai.011G088900	1.7547
												Gorai.010G044900	1.1942	Gorai.003G051200	1.0371
												Gorai.007G371500	1.385	Gorai.009G296300	1.269
												Gorai.001G134100	2.0882	Gorai.009G162400	1.1766
												Gorai.005G189300	1.1178	Gorai.012G042800	1.2182
												Gorai.009G244700	1.7796	Gorai.008G014100	1.9469
												Gorai.007G194400	1.7913	Gorai.006G202700	1.0202
												Gorai.003G099400	1.1778	Gorai.003G149300	1.6985
												Gorai.001G231200	1.2312	Gorai.009G322200	1.0652
												Gorai.003G146100	1.4322	Gorai.003G162000	1.0547
												Gorai.013G226200	2.5095	Gorai.010G044000	1.4576
												Gorai.012G125900	1.849	Gorai.004G200500	2.2719
												Gorai.008G111300	1.7801	Gorai.008G239200	1.2534
												Gorai.007G309100	2.1233	Gorai.001G043000	7.9912
												Gorai.008G187000	1.2365	Gorai.003G064600	1.0834
												Gorai.009G091100	1.2717	Gorai.009G236200	1.9356
												Gorai.004G088800	1.1227	Gorai.011G117900	1.1721
												Gorai.009G005000	1.127	Gorai.013G006900	1.368
												Gorai.009G130300	1.1339	Gorai.009G302100	1.3727
												Gorai.013G090200	1.9288	Gorai.012G105200	1.4797
												Gorai.010G179400	1.4269	Gorai.008G196200	1.1977
												Gorai.006G157500	1.2084	Gorai.010G060900	1.225
												Gorai.008G196800	1.2336	Gorai.010G218900	2.946
												Gorai.007G309500	1.9423	Gorai.007G216700	1.5699
												Gorai.003G001300	1.731	Gorai.010G079700	2.1045
												Gorai.011G152600	3.7243	Gorai.004G235800	1.2074
												Gorai.004G185800	1.0522	Gorai.001G200000	1.3268
												Gorai.007G007900	1.1631	Gorai.009G331800	1.1498
												Gorai.004G227900	1.1083	Gorai.008G199700	1.0292
												Gorai.004G221100	1.0146	Gorai.012G133800	1.0821
												Gorai.006G183100	1.1609	Gorai.001G151300	3.0451
												Gorai.003G115100	1.502	Gorai.002G099400	1.2851
												Gorai.006G164500	1.01	Gorai.013G180200	2.5225
												Gorai.009G296300	1.2619	Gorai.005G211700	1.1392
												Gorai.005G199600	1.218	Gorai.006G032300	1.3113
												Gorai.009G422000	1.803	Gorai.013G130300	2.3344
												Gorai.005G146600	1.8048	Gorai.005G236300	2.2582
												Gorai.007G018700	3.4424	Gorai.006G261100	1.6227
												Gorai.001G008800	3.7636	Gorai.013G178700	1.2611
												Gorai.008G239200	1.2594	Gorai.009G236400	7.6947
												Gorai.001G134800	1.1523	Gorai.001G182000	1.1236
												Gorai.010G053200	1.0027	Gorai.004G174400	1.498
												Gorai.008G052300	1.0038	Gorai.004G171300	1.9184
												Gorai.009G342100	1.0052	Gorai.010G042500	1.4521
												Gorai.011G006100	1.0101	Gorai.012G041300	1.1108
												Gorai.005G189800	1.0172	Gorai.011G195700	1.1006
												Gorai.012G082700	1.0219	Gorai.004G196000	2.4812
												Gorai.008G146100	1.0243	Gorai.001G046300	1.0869
												Gorai.012G037800	1.0264	Gorai.009G122900	2.0771
												Gorai.012G133300	1.0412	Gorai.006G093100	2.1718
												Gorai.010G117700	1.0418	Gorai.004G019900	1.0285
												Gorai.008G197000	1.0508	Gorai.006G231700	1.4069
												Gorai.006G205200	1.0568	Gorai.005G082700	1.4469
												Gorai.009G025600	1.0575	Gorai.008G257800	1.016
												Gorai.004G234700	1.0627	Gorai.005G189800	1.3553
												Gorai.001G033700	1.0662	Gorai.010G114600	1.6566
												Gorai.010G114600	1.0676	Gorai.009G128400	1.736
												Gorai.008G225300	1.0723	Gorai.010G148100	1.1895
												Gorai.008G034900	1.0818	Gorai.008G251900	1.741
												Gorai.009G164100	1.085	Gorai.001G107400	1.2028
												Gorai.001G047900	1.0882	Gorai.011G155900	1.0919
												Gorai.012G025200	1.0924	Gorai.001G232400	1.4977
												Gorai.006G063000	1.1048	Gorai.012G044200	1.5115
												Gorai.013G010700	1.1147	Gorai.003G124900	2.0619
												Gorai.009G206100	1.1158	Gorai.004G060800	1.2616
												Gorai.004G020100	1.123	Gorai.009G307600	1.6382
												Gorai.011G233300	1.1332	Gorai.001G196300	1.4171
												Gorai.007G248900	1.1334	Gorai.005G071000	2.7287
												Gorai.002G075700	1.1436	Gorai.005G248300	1.3654
												Gorai.010G214400	1.1577	Gorai.007G161800	1.5333
												Gorai.011G180400	1.1716	Gorai.011G214300	3.7283
												Gorai.002G222700	1.1769	Gorai.011G156100	1.0207
												Gorai.009G266400	1.1773	Gorai.006G121200	1.0335
												Gorai.010G199300	1.1792	Gorai.002G247800	1.0779
												Gorai.009G128400	1.181	Gorai.008G221400	1.0837
												Gorai.007G260200	1.186	Gorai.008G050300	1.0894
												Gorai.004G175900	1.201	Gorai.009G334100	1.0896
												Gorai.010G148100	1.2022	Gorai.003G003900	1.103
												Gorai.004G044000	1.2039	Gorai.008G286400	1.1045
												Gorai.009G265800	1.2084	Gorai.001G051300	1.1146
												Gorai.007G047300	1.2086	Gorai.008G195500	1.1254
												Gorai.010G134100	1.2137	Gorai.009G052600	1.1272
												Gorai.006G055800	1.2153	Gorai.007G121600	1.1279
												Gorai.013G008500	1.2261	Gorai.008G136800	1.1279
												Gorai.011G073200	1.2358	Gorai.001G092800	1.1483
												Gorai.009G432700	1.2503	Gorai.002G237800	1.1503
												Gorai.008G257500	1.2514	Gorai.001G121900	1.1532
												Gorai.009G084200	1.2601	Gorai.001G126300	1.1631
												Gorai.011G129000	1.2706	Gorai.005G187600	1.1645
												Gorai.001G152300	1.2804	Gorai.003G060900	1.166
												Gorai.005G267100	1.2833	Gorai.008G042500	1.1712
												Gorai.N019000	1.2924	Gorai.008G005400	1.2026
												Gorai.009G073500	1.3102	Gorai.002G082700	1.2034
												Gorai.008G251900	1.3193	Gorai.005G136200	1.209
												Gorai.013G233700	1.3195	Gorai.004G088600	1.2097
												Gorai.N007200	1.3363	Gorai.008G216700	1.2187
												Gorai.002G218900	1.3696	Gorai.012G110600	1.2512
												Gorai.012G051600	1.3701	Gorai.003G055600	1.2535
												Gorai.009G296800	1.3753	Gorai.005G176600	1.2656
												Gorai.001G107400	1.3924	Gorai.012G017600	1.2781
												Gorai.008G042600	1.3937	Gorai.008G084700	1.3235
												Gorai.003G100500	1.4006	Gorai.009G102400	1.3264
												Gorai.002G144700	1.4055	Gorai.012G136900	1.3357
												Gorai.012G036300	1.4097	Gorai.004G276300	1.3405
												Gorai.009G235300	1.4173	Gorai.012G152300	1.3562
												Gorai.009G301700	1.4365	Gorai.009G282200	1.3771
												Gorai.006G042400	1.4517	Gorai.012G124400	1.4105
												Gorai.011G155900	1.4521	Gorai.001G073900	1.4174
												Gorai.007G097200	1.4714	Gorai.004G042100	1.452
												Gorai.008G134300	1.4797	Gorai.011G159100	1.4834
												Gorai.001G232400	1.4937	Gorai.009G293000	1.5199
												Gorai.007G300200	1.5179	Gorai.007G129400	1.5434
												Gorai.012G044200	1.5192	Gorai.006G006500	1.6063
												Gorai.007G342900	1.5542	Gorai.008G296400	1.6614
												Gorai.011G087000	1.5663	Gorai.009G247600	1.6762
												Gorai.002G156300	1.5712	Gorai.009G175400	1.6861
												Gorai.010G102800	1.5803	Gorai.013G210800	1.6967
												Gorai.005G113600	1.612	Gorai.013G024700	1.7569
												Gorai.006G190000	1.6182	Gorai.001G270000	1.7663
												Gorai.011G068800	1.6453	Gorai.009G079300	1.8343
												Gorai.003G124900	1.655	Gorai.007G048300	1.8456
												Gorai.008G221200	1.6742	Gorai.004G143200	1.8709
												Gorai.001G223900	1.6852	Gorai.009G066900	1.9134
												Gorai.005G241900	1.7179	Gorai.007G197400	1.9305
												Gorai.004G060800	1.7398	Gorai.008G015500	2.129
												Gorai.009G045900	1.7637	Gorai.007G125900	2.1506
												Gorai.009G307600	1.7944	Gorai.005G197000	2.1591
												Gorai.013G163600	1.8055	Gorai.009G453800	2.1892
												Gorai.004G222200	1.8121	Gorai.005G020900	2.4038
												Gorai.007G020900	1.8402	Gorai.006G254700	2.4594
												Gorai.007G275500	1.8425	Gorai.011G170700	2.577
												Gorai.011G278300	1.8441	Gorai.007G173500	2.6526
												Gorai.001G196300	1.8588	Gorai.010G225400	2.6618
												Gorai.002G265500	1.8864	Gorai.012G019700	2.7711
												Gorai.004G109600	1.8987	Gorai.004G170200	3.1579
												Gorai.005G071000	1.9212	Gorai.011G210100	3.2639
												Gorai.005G248300	1.9221	Gorai.008G258800	3.5282
												Gorai.007G161800	1.9363	Gorai.006G017800	8.1236
												Gorai.013G078900	2.0728
												Gorai.007G172000	2.0795
												Gorai.008G255400	2.1081
												Gorai.009G215100	2.2091
												Gorai.012G052500	2.2309
												Gorai.011G217300	2.2671
												Gorai.001G250300	2.3006
												Gorai.011G201500	2.309
												Gorai.012G129300	2.3289
												Gorai.009G288500	2.4304
												Gorai.010G082600	3.1106
												Gorai.008G001500	3.1472
												Gorai.006G118700	3.162
												Gorai.011G214300	3.7314
